# Supplementary material for: Paf1c defects challenge the robustness of flower meristem termination in Arabidopsis thaliana
Source: Oxford University Press journal article supplement (doi:10.1242/dev.173377), 2019-01-01
Supplement: dev173377supp.pdf [file dev173377supp.pdf]

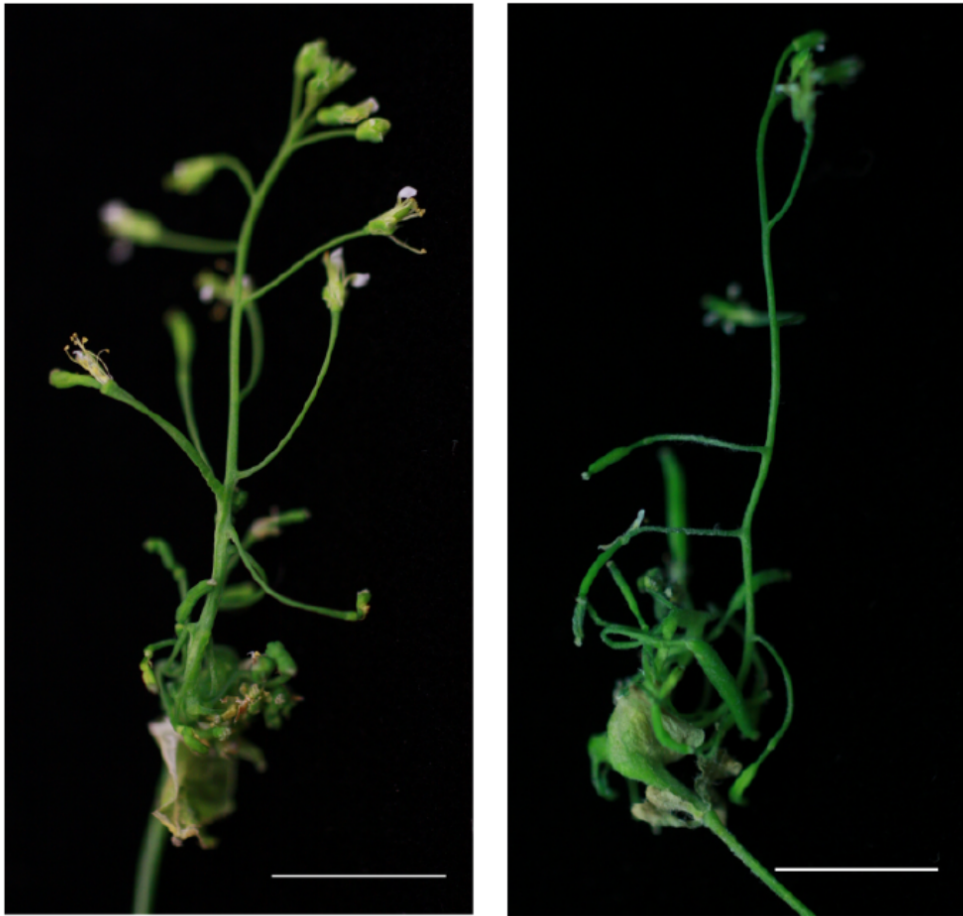

**Fig. S1. Examples of the most severe indeterminacy phenotypes in *vip3-1* siliques.**

Representative images of the most severe phenotypes in *vip3-1* flowers, displaying an inflorescence stem with siliques and flowers, emerging from a silique. Scale bar: 1 cm.

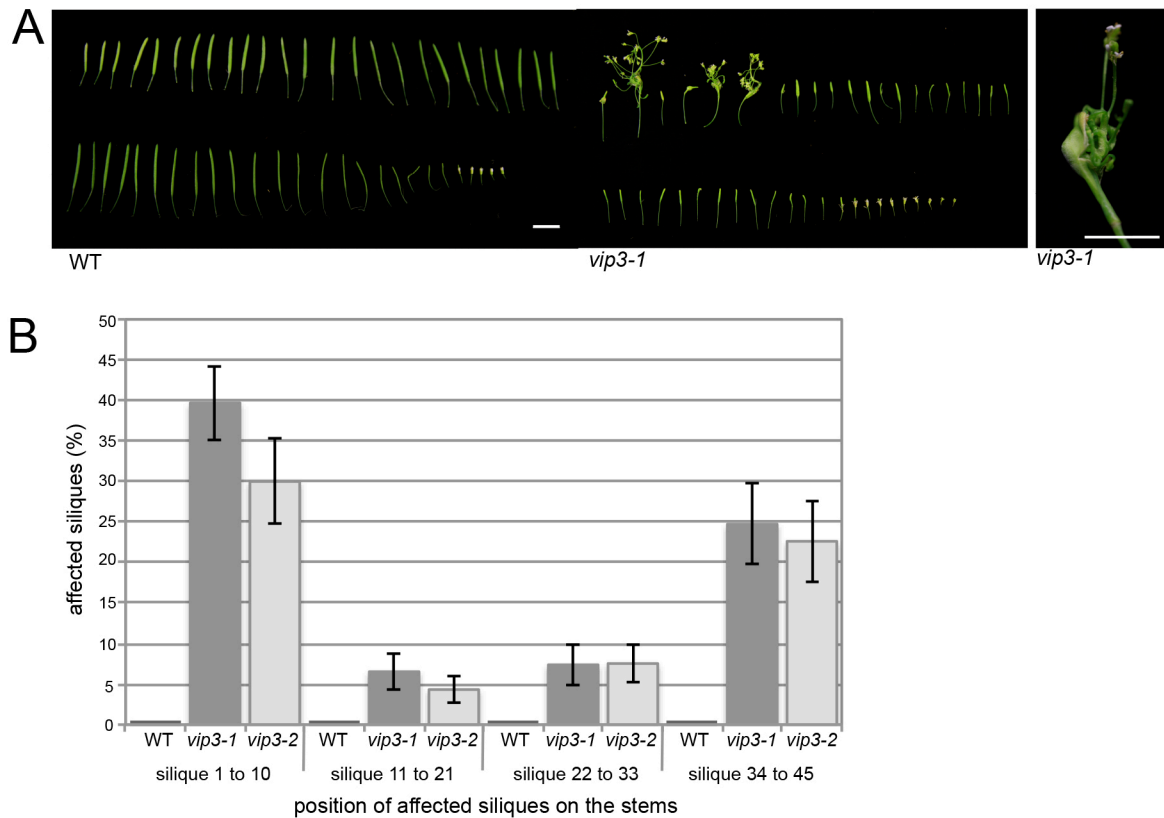

**Fig. S2. *vip3* phenotype in short day then continuous light 21°C.**

(A) Phenotype of WT (left panel) and *vip3-1* (middle panel) siliques, from plants grown in short day 21°C followed by continuous light 21°C conditions, harvested in a sequence of initiation along the stem. Scale bar : 1 cm. Right panel shows representative silique of the *vip3* displaying the indeterminacy phenotype. Scale bar : 5 mm. (B) Distribution (%) of affected siliques along the stems of the wild type (N=13), *vip3-1* (N=32) and *vip3-2* (N=21) grown in short day 21°C followed by continuous light 21°C condition (on average, 19% of *vip3-1* and 17% of *vip3-2* siliques displayed visible indeterminacy defects in these conditions).

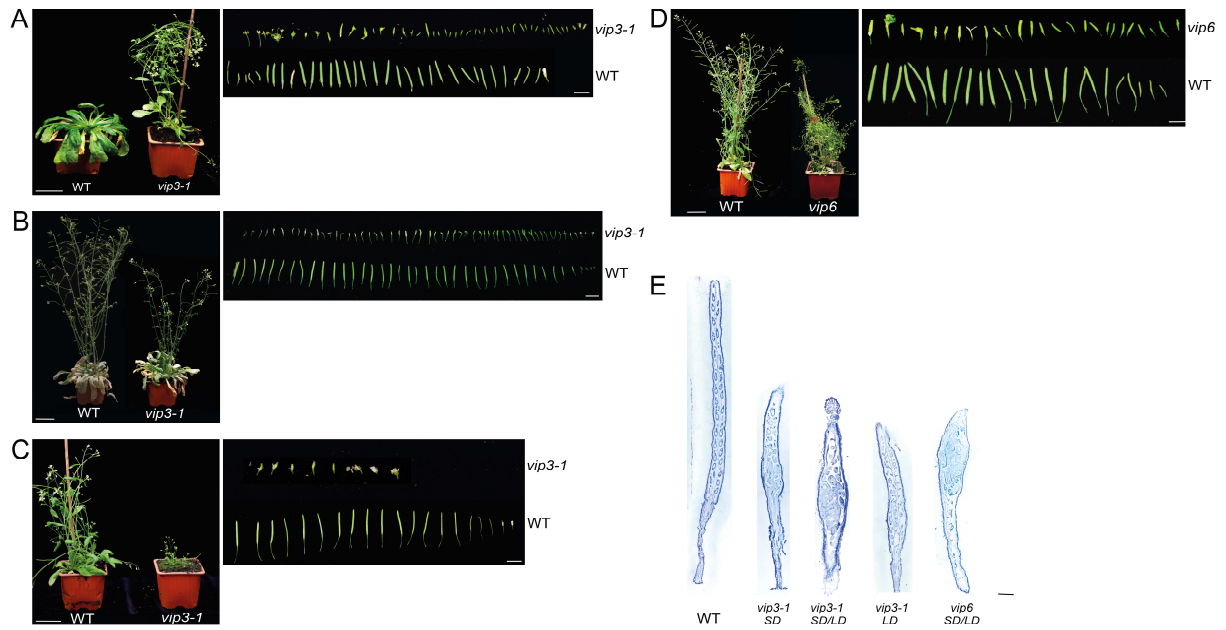

**Fig. S3. Indeterminacy phenotype in different growth conditions and in different mutants of the Paf1 complex.**

(A-C) Phenotypes of WT and *vip3-1* mutants grown in short day conditions (A, N=9 plants), in short then long day conditions (B, N=22 plants), and in long day conditions (C, N=22 plants). (D) Phenotype of WT and *vip6* mutant grown in short day 21°C followed by continuous light 16°C conditions displaying the indeterminacy phenotype (N=19 plants). For each condition, left panels display wild-type and *vip* adult plants, and right panels the siliques harvested in the order of their initiation along the stem. (E) Representative sections in young siliques, stained with toluidine blue, of *vip3-1*, in each culture condition, and *vip6* mutant, displaying the indeterminacy phenotype. Scale bars : 3 cm (A-D, left panels); 1 cm (A-D, right panels); 500  $\mu$ m (E).

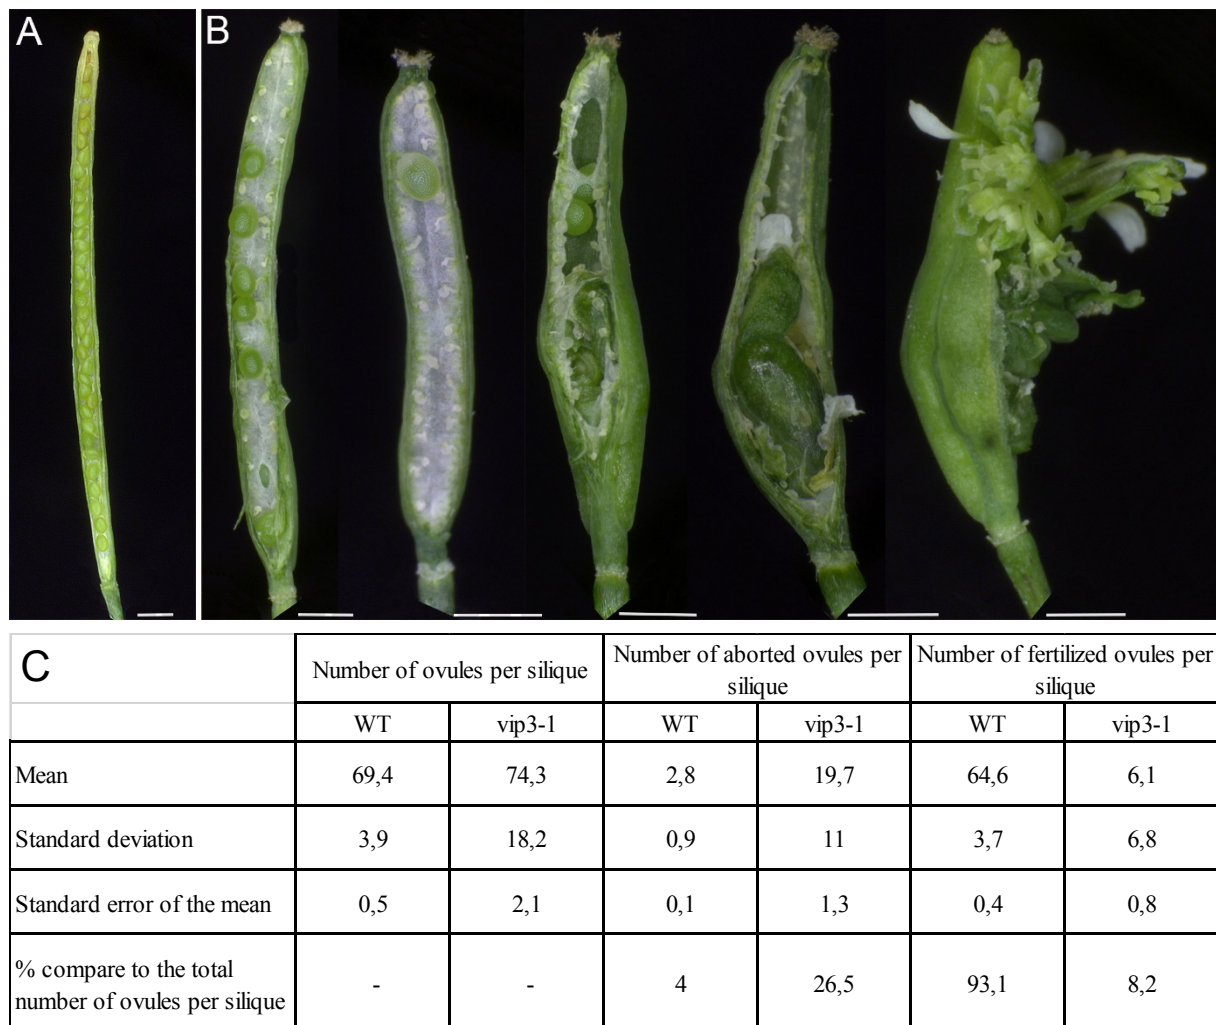

**Fig. S4. Proportion of aborted ovules and seeds in *vip3-1*.**

(A-B) illustrates the range of phenotypes observed in *vip3-1* (B) compared to Col0 (A) (grown in short day and then in continuous light 16°C). *vip3-1* displays a strong and highly variable reduction of seed set in siliques showing no indeterminacy. In silique showing indeterminacy no or very few seeds usually develop. Bars = 500  $\mu$ m. (C) Number of aborted ovules and seeds in *vip3-1* (N=73 siliques) and WT (N=70 siliques). The standard deviation reflects the variability of the original distribution. The standard error of the mean indicates the precision of estimated means (95% confidence interval).

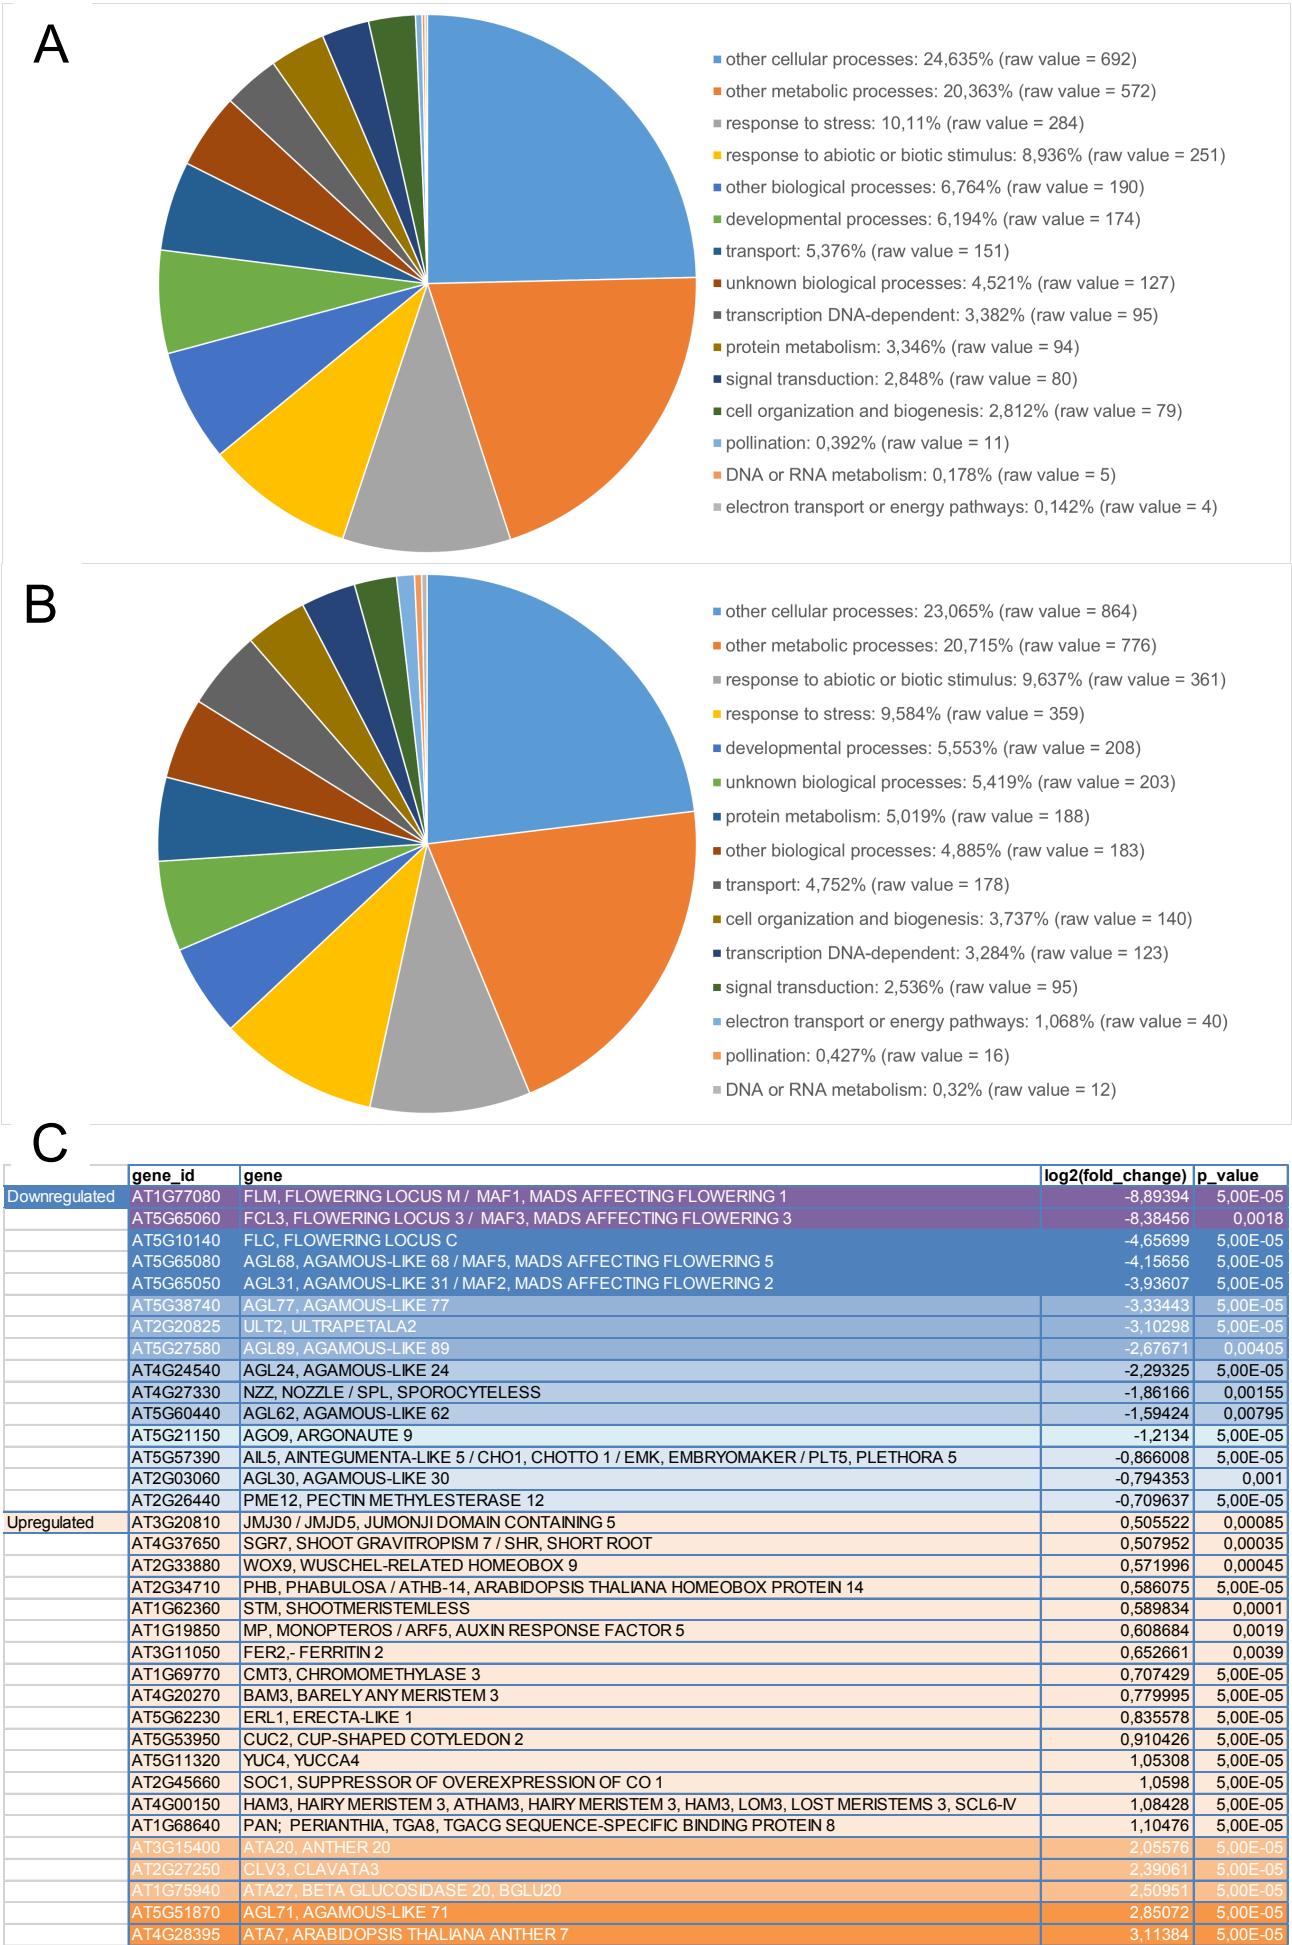

D

|               | gene_id   | gene                                                                                        | log2(fold_change) | p_value  |
|---------------|-----------|---------------------------------------------------------------------------------------------|-------------------|----------|
| Downregulated | AT2G14610 | PR1; pathogenesis-related protein 1                                                         | -5.18392          | 5.00E-05 |
|               | AT5G59220 | HAI1; PP2C protein (Clade A protein phosphatases type 2C)                                   | -1.72227          | 5.00E-05 |
|               | AT4G34760 | SAUR-like auxin-responsive protein family                                                   | -1.13968          | 5.00E-05 |
|               | AT1G08320 | TGA9; bZIP transcription factor family protein                                              | -0.969944         | 0.00355  |
|               | AT1G67710 | ARR11; response regulator 11                                                                | -0.934393         | 0.00065  |
|               | AT3G23030 | IAA2; indole-3-acetic acid inducible 2                                                      | -0.884945         | 0.0009   |
|               | AT4G34000 | ABF3; abscisic acid responsive elements-binding factor 3                                    | -0.857165         | 5.00E-05 |
|               | AT5G54510 | DFL1; Auxin-responsive GH3 family protein                                                   | -0.799458         | 5.00E-05 |
|               | AT5G57560 | TCH4; Xyloglucan endotransglucosylase/hydrolase family protein                              | -0.672642         | 5.00E-05 |
|               | AT3G23050 | IAA7; indole-3-acetic acid 7                                                                | -0.628497         | 0.00325  |
|               | AT1G03430 | AHP5; histidine-containing phosphotransfer factor 5                                         | -0.590316         | 0.0007   |
|               | AT4G34750 | SAUR-like auxin-responsive protein family                                                   | -0.579414         | 0.00535  |
| Upregulated   | AT1G80100 | AHP6; histidine phosphotransfer protein 6                                                   | 0.514231          | 0.0006   |
|               | AT2G22670 | IAA8; indoleacetic acid-induced protein 8                                                   | 0.537947          | 0.00075  |
|               | AT3G63010 | GID1B; alpha/beta-Hydrolases superfamily protein                                            | 0.572849          | 0.00025  |
|               | AT1G28130 | GH3.17; Auxin-responsive GH3 family protein                                                 | 0.575311          | 5.00E-05 |
|               | AT5G46570 | BSK2; BR-signaling kinase 2                                                                 | 0.576718          | 5.00E-05 |
|               | AT1G19850 | MP; Transcriptional factor B3 family protein / auxin-responsive factor AUX/IAA-like protein | 0.608684          | 0.0019   |
|               | AT1G51950 | IAA18; indole-3-acetic acid inducible 18                                                    | 0.628133          | 5.00E-05 |
|               | AT5G46790 | PYL1; PYR1-like 1                                                                           | 0.646811          | 5.00E-05 |
|               | AT2G38120 | AUX1; Transmembrane amino acid transporter family protein                                   | 0.691917          | 5.00E-05 |
|               | AT2G01570 | RGA1; GRAS family transcription factor family protein                                       | 0.759926          | 5.00E-05 |
|               | AT1G45249 | ABF2; abscisic acid responsive elements-binding factor 2                                    | 0.794846          | 5.00E-05 |
|               | AT1G19050 | ARR7; response regulator 7                                                                  | 0.811842          | 5.00E-05 |
|               | AT2G38310 | PYL4; PYR1-like 4                                                                           | 0.856148          | 5.00E-05 |
|               | AT4G27260 | WES1; Auxin-responsive GH3 family protein                                                   | 0.864813          | 5.00E-05 |
|               | AT1G72450 | JAZ6; jasmonate-zim-domain protein 6                                                        | 0.885443          | 5.00E-05 |
|               | AT1G17380 | JAZ5; jasmonate-zim-domain protein 5                                                        | 0.960683          | 5.00E-05 |
|               | AT4G33950 | OST1; Protein kinase superfamily protein                                                    | 1.02011           | 5.00E-05 |
|               | AT5G13220 | JAZ10; jasmonate-zim-domain protein 10                                                      | 1.03421           | 5.00E-05 |
|               | AT1G19180 | JAZ1; jasmonate-zim-domain protein 1                                                        | 1.04499           | 5.00E-05 |
|               | AT5G11320 | YUC4, YUCCA4                                                                                | 1.05308           | 5.00E-05 |
|               | AT2G41310 | RR3; response regulator 3                                                                   | 1.11732           | 5.00E-05 |
|               | AT1G77920 | TGA7; bZIP transcription factor family protein                                              | 1.15091           | 0.00385  |
|               | AT5G17490 | RGL3; RGA-like protein 3                                                                    | 1.15216           | 5.00E-05 |
|               | AT3G11410 | PP2CA; protein phosphatase 2CA                                                              | 1.21844           | 5.00E-05 |
|               | AT4G14550 | IAA14; indole-3-acetic acid inducible 14                                                    | 1.31153           | 0.0009   |
|               | AT1G04250 | AXR3; AUX/IAA transcriptional regulator family protein                                      | 1.58048           | 0.0001   |
|               | AT3G21510 | AHP1; histidine-containing phosphotransmitter 1                                             | 1.80767           | 0.00015  |
|               | AT1G77690 | LAX3; like AUX1 3                                                                           | 2.1705            | 5.00E-05 |
|               | AT4G00880 | SAUR-like auxin-responsive protein family                                                   | 2.62316           | 5.00E-05 |
|               | AT5G13380 | Auxin-responsive GH3 family protein                                                         | 3.54665           | 5.00E-05 |
|               | AT2G46690 | SAUR-like auxin-responsive protein family                                                   | 3.63345           | 5.00E-05 |

**Fig. S5. Differential gene expression in *vip3-1* vs. wild-type shoot apices.**

(A, B) Gene ontology analysis: categories of genes involved in biological processes that are up-regulated (A) and down-regulated (B) in *vip3-1*. (C, D) Short list of genes involved in flowering and flower development (C) and signaling (D) pathways that are misexpressed in *vip3-1*. Genes that are down-regulated are highlighted in blue, and those that are up-regulated are highlighted in orange.

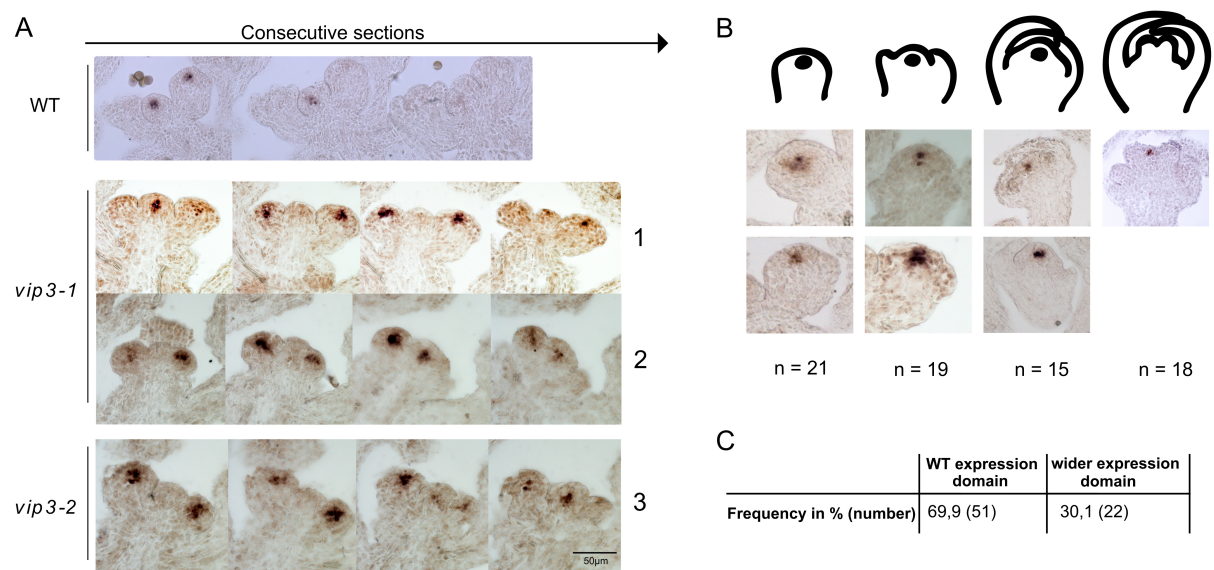

**Fig. S6. Expression patterns of *WUS* in *vip3* flowers.**

(A, B) *In situ* hybridization of *WUS* transcripts in wild-type (A, upper panel) and *vip3-1* (A, lower panel and B). (A) Consecutive sections on WT and 3 independent *vip3* (1-2: *vip3-1*; 3: *vip3-2*) apices showing an expansion of *WUS* expression domain in *vip3-1* floral meristems, when compared to wild type. (B) Representative patterns of *WUS* expression domain in *vip3-1* flower buds at four different developmental stages (as represented by schematic drawings). Plants were grown in short day then continuous light 16°C conditions (as in Fig. 1). Scale bar: 50 µm. (C) Number of flower meristems displaying a wild-type *WUS* expression domain and an enlarged *WUS* expression domain in *vip3-1*.

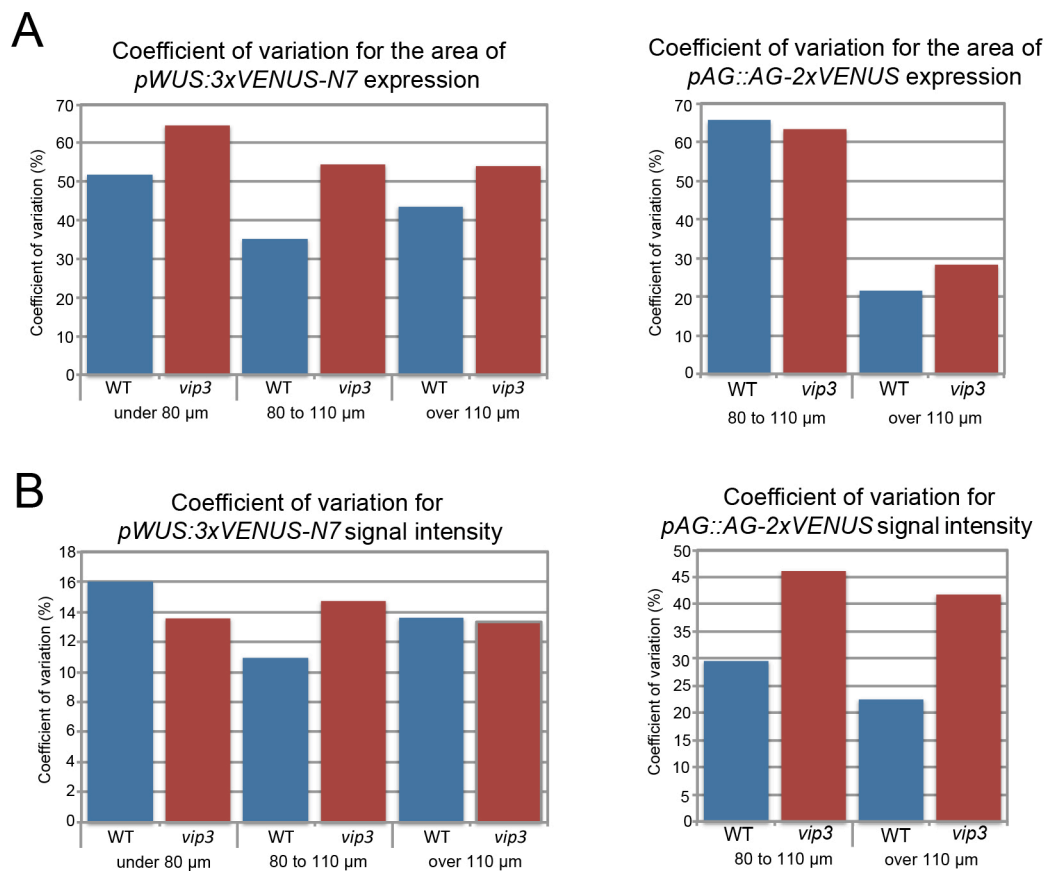

**Fig. S7. Coefficient of variation for *WUS* and *AG* expression area and average intensity in *vip3* flowers**

(A) Histograms displaying the coefficients of variation (%) for the area of *pWUS::3xVENUS-N7* (left) and *pAG::AG-2xVENUS* (right) expression in wild-type and *vip3-1* flowers. (B) Histograms displaying the coefficients of variation for the average fluorescence signal intensity of *pWUS::3xVENUS-N7* (left) and *pAG::AG-2xVENUS* (right) expression in wild-type and *vip3-1* flowers.

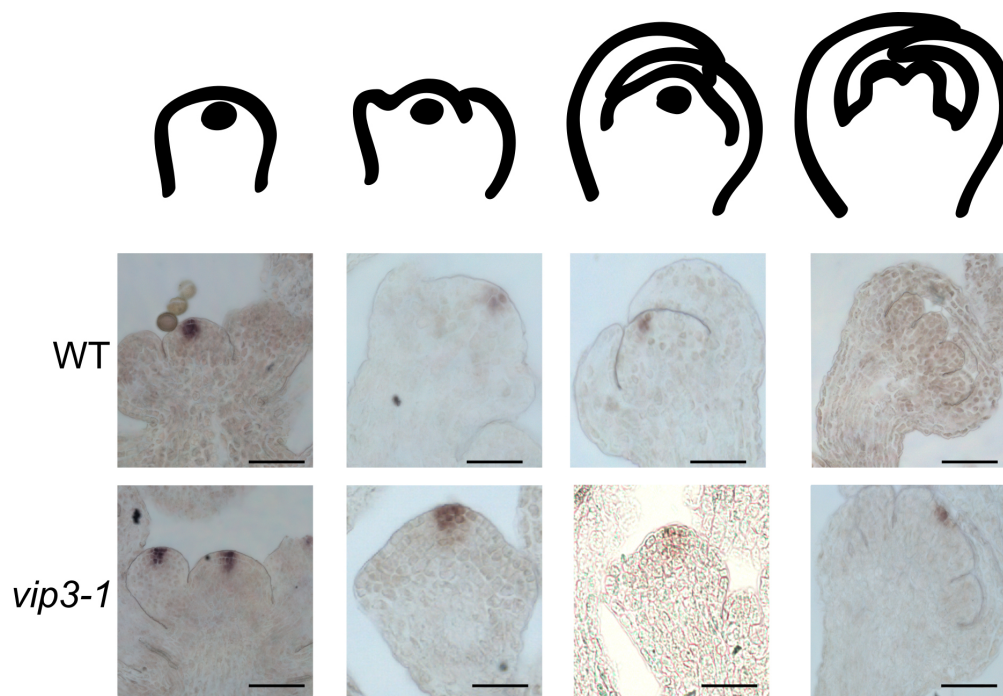

**Figure S8. Expression patterns of *CLV3* in *vip3-1* flowers**

*In situ* hybridization of *CLV3* transcripts in wild-type (A) and *vip3-1* (B). Plants were grown in short day then continuous light 16°C conditions (as in Figure 1). Scale bar = 50  $\mu$ m.

**Table S1.** List of primers

| Name                                            | Sequence                                       |
|-------------------------------------------------|------------------------------------------------|
| Genotyping primers                              |                                                |
| LBb1.3                                          | ATTTTGCCGATTTCGGAAC                            |
| <i>vip3-1</i> F                                 | GACTGCAAGTACCACTTTCGC                          |
| <i>vip3-1</i> R                                 | TAATGGGAAACGACTTGCTTG                          |
| <i>vip3-2</i> F                                 | CTGACTGGATCTCTTGACGAGACG                       |
| <i>vip3-2</i> R                                 | GATACTCAGCAATTCCATATAGTACCCAAGC                |
| Primers for <i>in situ</i> probes               |                                                |
| <i>WUS_in_situ_F</i>                            | CAACAAGTCCGGCTCTGGTG                           |
| <i>WUS_in_situ_RT7</i>                          | TGTAATACGACTCACTATAGGGCGGGAAGAGAGGAAGCGTACGTCG |
| <i>AG_in_situ_F</i>                             | ACGGCGTACCAATCGGAGCT                           |
| <i>AG_in_situ_RT7</i>                           | TGTAATACGACTCACTATAGGGCGTTGCAATGCCGCGACTTGG    |
| <i>CLV3_in_situ_F</i>                           | ATGTCCGGTCCAGTTCAACAAC                         |
| <i>CLV3_in_situ_RT7</i>                         | TGTAATACGACTCACTATAGGGCGGTCAGGTCCCGAAGGAACA    |
| Primers for <i>pAG::AG-2xVenus</i> construction |                                                |
| <i>pPD381</i>                                   | GTCCCCGGGAGTGATCCCTTCTCCAACACA                 |
| <i>pPD413</i>                                   | AGTCCCCGGGTAAGTGGAGAGCGGTTTGGT                 |
| <i>pPD441</i>                                   | AGTGGATCCGCAGCTGCCGCAGCTGCGATGGTGAGCAAGGGCGAG  |
| <i>pPD442</i>                                   | GTCTCTAGACTAGATAGATCTCTTGACAGCTC               |
